# Supplementary material for: Structure-guided discovery of a single-domain antibody agonist against human apelin receptor
Source: PubMed Central journal article supplement — Sci Adv. 2020 Jan 15;6(3):eaax7379. doi: 10.1126/sciadv.aax7379 (PMC6962038; doi:10.1126/sciadv.aax7379), 2020-01-15
Supplement: aax7379_SM.pdf [file aax7379_SM.pdf]

Supplementary Materials for  
**Structure-guided discovery of a single-domain antibody  
agonist against human apelin receptor**

Yanbin Ma, Yao Ding, Xianqiang Song, Xiaochuan Ma, Xun Li, Ning Zhang, Yunpeng Song, Yaping Sun,  
Yuqing Shen, Wenge Zhong, Liaoyuan A. Hu, Yingli Ma, Mei-Yun Zhang\*

\*Corresponding author. Email: meiyunz@amgen.com

Published 15 January 2020, *Sci. Adv.* **6**, eaax7379 (2020)  
DOI: 10.1126/sciadv.aax7379

**This PDF file includes:**

Fig. S1. Binding and thermo-stabilizing effect of JN241 to APJ and formation of stable APJ-JN241 complex and co-crystals.

Fig. S2. Simple omit maps of JN241 CDR1, CDR2 and CDR3.

Fig. S3. Characterization of JN241 epitope and identification of the critical residue E174 in APJ ECL2 for its binding and function.

Fig. S4. Amino acid sequence alignment of JN241 and its nine mutants.

Fig. S5. Comparison of the receptor-ligand interactions.

Table S1. Data collection and structure refinement statistics.

Table S2. Interaction residues on APJ-JN241 interface according to the cocrystal structure.

Table S3. EC<sub>50</sub> and IC<sub>50</sub> values of JN241 and its mutants fused to human Fc in APJ cAMP and  $\beta$ -arrestin assays.

Table S4. Conservation of WT APJ, AT1R, and AT2R residues critical for ligand binding.

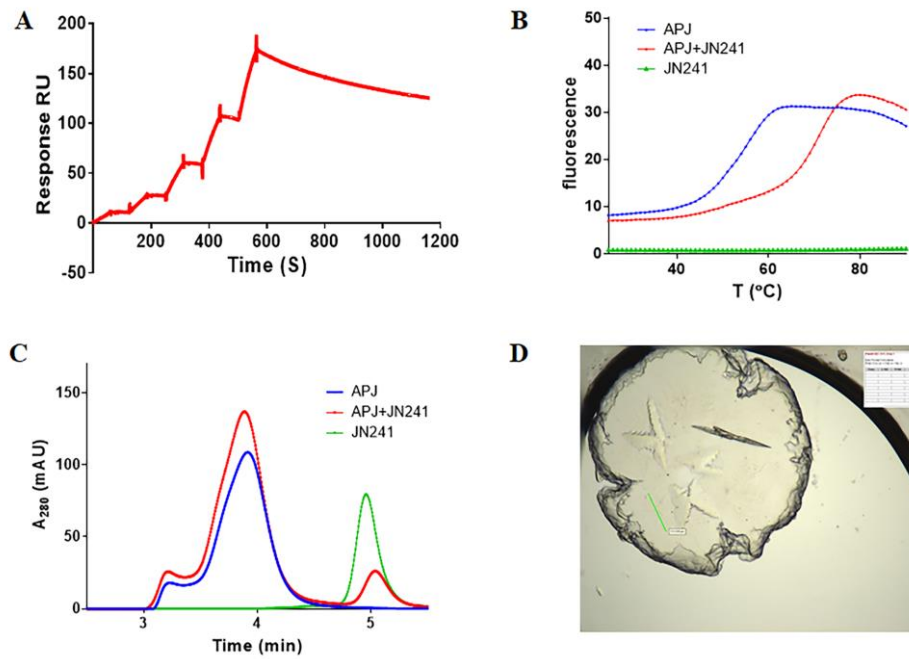

**Fig. S1. Binding and thermo-stabilizing effect of JN241 to APJ and formation of stable APJ-JN241 complex and co-crystals.** Binding (A) and thermo-stabilizing effect (B) of JN241 to APJ and formation of stable APJ-JN241 complex (C) and co-crystals (D). **A.** Potent binding of JN241 to APJ463 nanodiscs by Biacore. APJ463 nanodiscs were immobilized on a SA chip. Soluble JN241 at 10 and 100 nM flew through the surface. Binding kinetics was obtained from curve fitting using Biacore evaluation software. **B.** Thermostability assay of APJ3136 micelles, sdAb JN241, and APJ3136 bound to JN241. **C.** SEC of APJ3136 micelles, sdAb JN241, and APJ3136 complexed with JN241. **D.** Representative co-crystals of APJ3136 in complex with JN241.

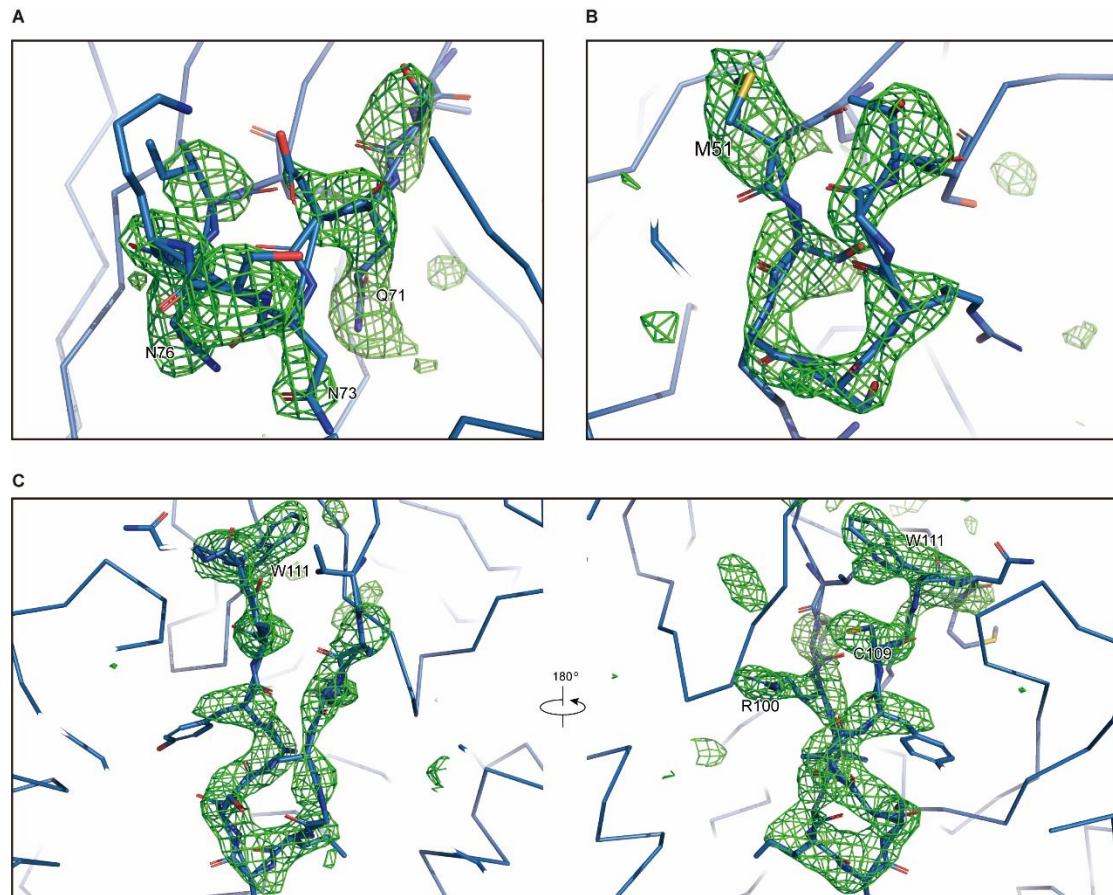

**Fig. S2. Simple omit maps of JN241 CDR1, CDR2 and CDR3.** Simple omit maps (green mesh) of JN241 CDR1 (A), CDR2 (B) and CDR3 (C), showing the *F<sub>o</sub>-F<sub>c</sub>* electron densities contoured at  $3.0\sigma$ . The models of the CDRs are shown in blue sticks.

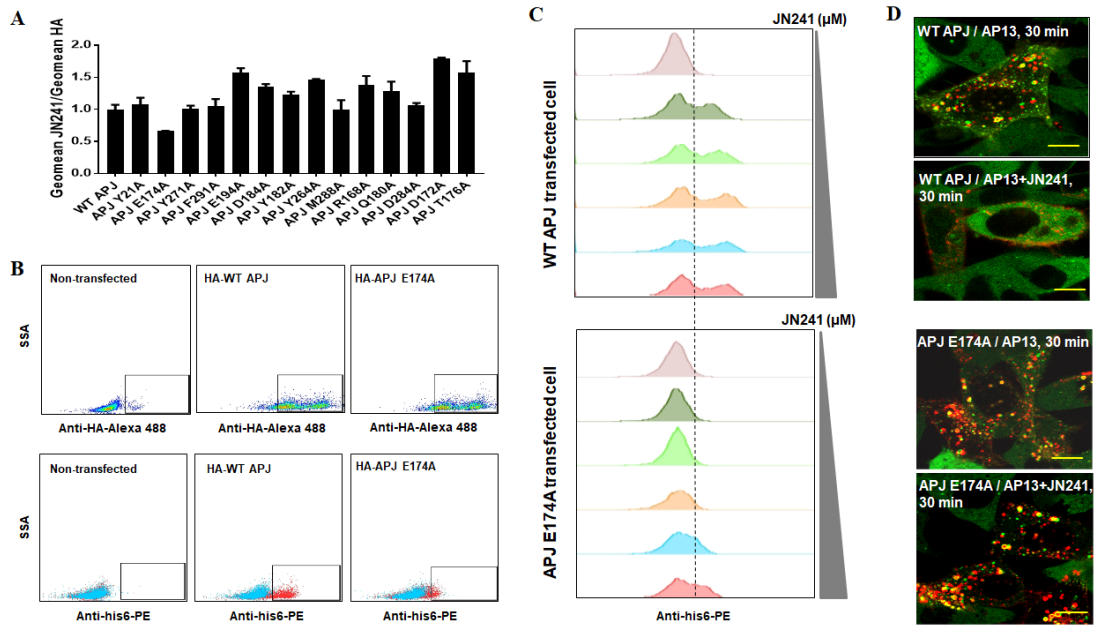

**Fig. S3. Characterization of JN241 epitope and identification of the critical residue E174 in APJ ECL2 for its binding and function.** **A.** Relative binding of soluble sdAb JN241 to 293FT cells transiently expressing HA-tagged WT APJ or APJ site mutants by flow cytometry. Data from representative 14 APJ alanine mutants are shown. **B.** Flow cytometry (dot plots) of parental 293FT cells and HA-tagged WT APJ or APJ E174A mutant transfected 293FT cells stained with either Alexa 488 conjugated to anti-HA antibody or PE conjugated to anti-his6 antibody following 1 μM JN241 incubation. blue: No staining control; red: 1 μM JN241 stained. **C.** Histogram of flow cytometry with WT APJ or APJ E174A mutant transfected 293FT cells stained with 3-fold serially diluted JN241 with a start concentration of 1 μM followed by PE conjugated to anti-his6 antibody. **D.** Confocal microscopy analysis of WT APJ and APJ E174A mutant receptor internalization in response to 100 nM Apelin13 in the presence or absence of 1 μM JN241. The re-distribution of APJ (red) and β-arrestin 2 (green) was captured by confocal microscopy in unstimulated status or after the induction with ligand in the presence or absence of JN241 for 30 min. Yellow bar represents 10 μm length. AP13: Apelin 13. Arrb2-GFP: β-arrestin 2 fused to GFP.

|         | FR1                       | CDR1                 | FR2          | CDR2                         |
|---------|---------------------------|----------------------|--------------|------------------------------|
| JN241   | QVQLVESGGGVSQSGGSLTLSCAAS | <b>GSTYSSH</b> CMGWF | QAPGKEREGVAL | <b>MTRS</b> RGTSYADSVKGRFTIS |
| JN241-1 | QVQLVESGGGVSQSGGSLTLSCAAS | <b>GSTYSSH</b> CMGWF | QAPGKEREGVAL | <b>MTRS</b> RGTSYADSVKGRFTIS |
| JN241-2 | QVQLVESGGGVSQSGGSLTLSCAAS | <b>GSTYSSH</b> CMGWF | QAPGKEREGVAL | <b>MTRS</b> RGTSYADSVKGRFTIS |
| JN241-3 | QVQLVESGGGVSQSGGSLTLSCAAS | <b>GSTYSSH</b> CMGWF | QAPGKEREGVAL | <b>MTRS</b> RGTSYADSVKGRFTIS |
| JN241-4 | QVQLVESGGGVSQSGGSLTLSCAAS | <b>GSTYSSH</b> CMGWF | QAPGKEREGVAL | <b>MTRS</b> RGTSYADSVKGRFTIS |
| JN241-5 | QVQLVESGGGVSQSGGSLTLSCAAS | <b>GSTYSSH</b> CMGWF | QAPGKEREGVAL | <b>MTRS</b> RGTSYADSVKGRFTIS |
| JN241-6 | QVQLVESGGGVSQSGGSLTLSCAAS | <b>GSTYSSH</b> CMGWF | QAPGKEREGVAL | <b>MTRS</b> RGTSYADSVKGRFTIS |
| JN241-7 | QVQLVESGGGVSQSGGSLTLSCAAS | <b>GSTYSSH</b> CMGWF | QAPGKEREGVAL | <b>MTRS</b> RGTSYADSVKGRFTIS |
| JN241-8 | QVQLVESGGGVSQSGGSLTLSCAAS | <b>GSTYSSH</b> CMGWF | QAPGKEREGVAL | <b>MTRS</b> RGTSYADSVKGRFTIS |
| JN241-9 | QVQLVESGGGVSQSGGSLTLSCAAS | <b>GSTYSSH</b> CMGWF | QAPGKEREGVAL | <b>MTRS</b> RGTSYADSVKGRFTIS |

  

|         | FR3                     | CDR3                                                      | FR4   |
|---------|-------------------------|-----------------------------------------------------------|-------|
| JN241   | QDNTKNILYLQMNSLKPEDTAMY | <b>CAAVPRAGI</b> E-SGAYCKWNMKDSGSWGQGLT                   | VTVSS |
| JN241-1 | QDNTKNILYLQMNSLKPEDTAMY | <b>CAAVPRAGI</b> <b>F</b> -SGAYCKWNMKDSGSWGQGLT           | VTVSS |
| JN241-2 | QDNTKNILYLQMNSLKPEDTAMY | <b>CAAVPRAGI</b> <b>W</b> -SGAYCKWNMKDSGSWGQGLT           | VTVSS |
| JN241-3 | QDNTKNILYLQMNSLKPEDTAMY | <b>CAAVPRAGI</b> <b>Y</b> -SGAYCKWNMKDSGSWGQGLT           | VTVSS |
| JN241-4 | QDNTKNILYLQMNSLKPEDTAMY | <b>CAAVPRAGI</b> <b>E</b> - <b>F</b> SGAYCKWNMKDSGSWGQGLT | VTVSS |
| JN241-5 | QDNTKNILYLQMNSLKPEDTAMY | <b>CAAVPRAGI</b> <b>E</b> - <b>W</b> SGAYCKWNMKDSGSWGQGLT | VTVSS |
| JN241-6 | QDNTKNILYLQMNSLKPEDTAMY | <b>CAAVPRAGI</b> <b>E</b> - <b>Y</b> SGAYCKWNMKDSGSWGQGLT | VTVSS |
| JN241-7 | QDNTKNILYLQMNSLKPEDTAMY | <b>CAAVPRAGI</b> <b>E</b> <b>F</b> SGAYCKWNMKDSGSWGQGLT   | VTVSS |
| JN241-8 | QDNTKNILYLQMNSLKPEDTAMY | <b>CAAVPRAGI</b> <b>E</b> <b>W</b> SGAYCKWNMKDSGSWGQGLT   | VTVSS |
| JN241-9 | QDNTKNILYLQMNSLKPEDTAMY | <b>CAAVPRAGI</b> <b>E</b> <b>Y</b> SGAYCKWNMKDSGSWGQGLT   | VTVSS |

**Fig. S4. Amino acid sequence alignment of JN241 and its nine mutants.** Mutations are in red and highlighted in the rectangular frame.

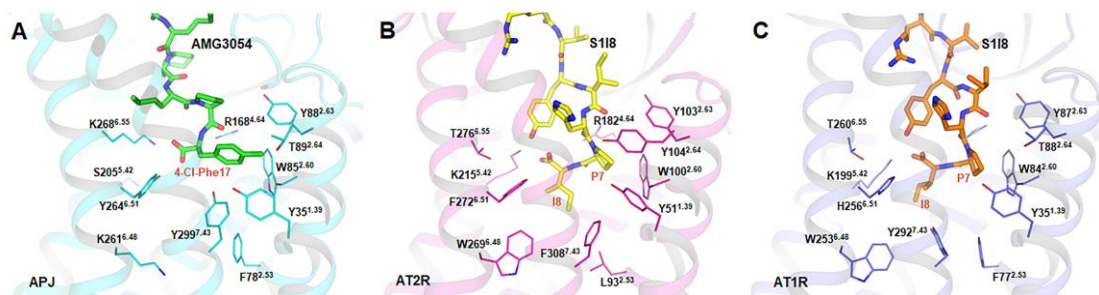

**Fig. S5. Comparison of the receptor-ligand interactions.** **A.** APJ-AMG3054 (PDB ID: 5VBL); **B.** AT2R-S1I8 (PDB ID: 5XJM); **C.** AT1R-S1I8 (PDB ID: 6DO1). APJ (in cyan), AT2R (in magenta) and AT1R (in blue) are shown as cartoons. The ligands AMG3054 (in green), S1I8 (in yellow) and S1I8 (in orange) are shown as sticks. APJ, AT2R and AT1R residues at the bottom of the orthosteric sites are shown as lines.

**Table S1. Data collection and structure refinement statistics.**

| APJ-JN241                                               |                                               |
|---------------------------------------------------------|-----------------------------------------------|
| <b>Data collection</b>                                  |                                               |
| Space group                                             | P2 <sub>1</sub> 2 <sub>1</sub> 2 <sub>1</sub> |
| Cell dimensions                                         |                                               |
| <i>a</i> , <i>b</i> , <i>c</i> (Å)                      | 44.78, 48.39, 350.10                          |
| $\alpha$ , $\beta$ , $\gamma$ (°)                       | 90.00, 90.00, 90.00                           |
| Resolution (Å)                                          | 50-3.2(3.28-3.20)*                            |
| <i>R</i> <sub>merge</sub> (%)                           | 19.4(39.6)                                    |
| <i>I</i> / $\sigma$ <i>I</i>                            | 4.38(1.86)                                    |
| Completeness (%)                                        | 92.5(62.1)                                    |
| Redundancy                                              | 3.2(1.8)                                      |
| <b>Refinement</b>                                       |                                               |
| Resolution (Å)                                          | 46.6-3.2                                      |
| No. reflections                                         | 12359                                         |
| <i>R</i> <sub>work</sub> / <i>R</i> <sub>free</sub> (%) | 25.6/30.1                                     |
| No. atoms                                               |                                               |
| Protein                                                 | 3742                                          |
| Ligand/ion                                              | 1                                             |
| <i>B</i> -factors                                       |                                               |
| Protein                                                 | 97.40                                         |
| Ligand/ion                                              | 82.86                                         |
| R.m.s. deviations                                       |                                               |
| Bond lengths (Å)                                        | 0.014                                         |
| Bond angles (°)                                         | 1.403                                         |
| Ramachandran plot statistics (%)                        |                                               |
| Favored                                                 | 88.14                                         |
| Allowed                                                 | 11.86                                         |
| Disallowed                                              | 0                                             |

\*Values in parentheses are for highest-resolution shell.

**Table S2. Interaction residues on APJ-JN241 interface according to the cocrystal structure.**

| <b>Interaction residue on APJ</b> | <b>Location of the residue on APJ</b> | <b>Corresponding interaction residue on JN241</b> | <b>Location of the residue on JN241</b> | <b>Nature of the interaction</b> |
|-----------------------------------|---------------------------------------|---------------------------------------------------|-----------------------------------------|----------------------------------|
| GLU20                             | N-terminus                            | SER70                                             | FR3                                     | Hydrogen Bond                    |
|                                   |                                       | GLN71 (backbone)                                  | FR3                                     | Hydrogen Bond                    |
|                                   |                                       | CYS33                                             | CDR1                                    | Hydrophobic                      |
| TYR21                             | N-terminus                            | CYS33 (backbone)                                  | CDR1                                    | Hydrogen Bond                    |
|                                   |                                       | MET34 (backbone)                                  | FR2                                     | Hydrogen Bond                    |
|                                   |                                       | MET51                                             | CDR2                                    | Hydrophobic                      |
|                                   |                                       | GLN71                                             | FR3                                     | Hydrogen Bond                    |
| ASP92                             | TM2                                   | ARG53                                             | CDR2                                    | Electrostatic                    |
| TYR93                             | ECL1                                  | TYR108                                            | CDR3                                    | Hydrophobic                      |
|                                   |                                       | GLU104                                            | CDR3                                    | Electrostatic                    |
| ARG168                            | TM4                                   | GLU104 (backbone)                                 | CDR3                                    | Hydrogen Bond                    |
| LEU173                            | ECL2                                  | MET113                                            | CDR3                                    | Hydrophobic                      |
|                                   |                                       | THR52                                             | CDR2                                    | Hydrogen Bond                    |
| GLU174                            | ECL2                                  | SER54                                             | CDR2                                    | Hydrogen Bond                    |
|                                   |                                       | CYS109 (backbone)                                 | CDR3                                    | Hydrogen Bond                    |
| ASN175 (backbone)                 | ECL2                                  | ARG55                                             | CDR2                                    | Hydrogen Bond                    |
| TYR182 (backbone)                 | ECL2                                  | SER105                                            | CDR3                                    | Hydrogen Bond                    |
| MET183 (backbone)                 | ECL2                                  | SER105                                            | CDR3                                    | Hydrogen Bond                    |
| ASP184                            | ECL2                                  | LYS110                                            | CDR3                                    | Hydrogen Bond; Electrostatic     |
| VAL191                            | ECL2                                  | PRO99                                             | CDR3                                    | Hydrophobic                      |
| SER192                            | ECL2                                  | GLN1 (backbone)                                   | FR1                                     | Hydrogen Bond                    |
| GLU194                            | TM5                                   | LYS110                                            | CDR3                                    | Electrostatic                    |
| GLU198                            | TM5                                   | GLY102 (backbone)                                 | CDR3                                    | Hydrogen Bond                    |
| TYR264                            | TM6                                   | GLU104                                            | CDR3                                    | Hydrogen Bond                    |
|                                   |                                       | SER30 (backbone)                                  | CDR1                                    | Hydrogen Bond                    |
| TYR271                            | TM6                                   | ILE103                                            | CDR3                                    | Hydrophobic                      |
| SER275                            | TM6                                   | SER30                                             | CDR1                                    | Hydrogen Bond                    |
| CYS281                            | TM7                                   | TYR29                                             | CDR1                                    | Pi-Sulfur                        |
| ASP284                            | TM7                                   | SER30                                             | CDR1                                    | Hydrogen Bond                    |
| MET288                            | TM7                                   | ALA107                                            | CDR3                                    | Hydrophobic                      |
|                                   |                                       | ILE103                                            | CDR3                                    | Hydrophobic                      |
| PHE291                            | TM7                                   | ILE103-GLU104 (backbone)                          | CDR3                                    | Hydrophobic                      |

**Table S3. EC<sub>50</sub> and IC<sub>50</sub> values of JN241 and its mutants fused to human Fc in APJ cAMP and β-arrestin assays.**

| JN241 mutant fusion to human Fc | Mutations or insertions at position E104 and S105 | EC <sub>50</sub> (M) in cAMP assay | IC <sub>50</sub> (M) in cAMP assay | EC <sub>50</sub> (M) in β-arrestin assay | IC <sub>50</sub> (M) in β-arrestin assay |
|---------------------------------|---------------------------------------------------|------------------------------------|------------------------------------|------------------------------------------|------------------------------------------|
| Apelin13                        | /                                                 | 6.72E-10                           | /                                  | 5.41E-10                                 |                                          |
| JN241-1                         | <b>FS</b>                                         | /                                  | 2.12E-08                           |                                          |                                          |
| JN241-2                         | <b>WS</b>                                         | /                                  | 1.74E-08                           |                                          |                                          |
| JN241-3                         | <b>YS</b>                                         | /                                  | 2.05E-08                           |                                          |                                          |
| JN241-4                         | <b>EF</b>                                         | /                                  | 5.15E-08                           |                                          |                                          |
| JN241-5                         | <b>EW</b>                                         | /                                  | 4.79E-08                           |                                          |                                          |
| JN241-6                         | <b>EY</b>                                         | /                                  | 4.75E-08                           |                                          |                                          |
| JN241-7                         | E[ <b>F</b> ]S                                    | 1.51E-07                           | 1.66E-08*                          | 3.12E-08                                 | /                                        |
| JN241-8                         | E[ <b>W</b> ]S                                    | /                                  | 3.39E-08                           | /                                        | > 1.00E-7                                |
| JN241-9                         | E[ <b>Y</b> ]S                                    | 3.58E-08                           | /                                  | 4.70E-08                                 | /                                        |
| JN241-Fc                        | /                                                 | /                                  | 3.08E-08                           | /                                        | > 1.00E-7                                |

Mutations or insertions are in bold. [ ]: Insertions. “/”: Non-functional. \*: Partial

agonist. Blank: Not tested.



**Table S4. Conservation of WT APJ, AT1R, and AT2R residues critical for ligand binding.** Identical amino acids are highlighted in bold.

| Location | 1.39       | 2.53       | 2.60        | 2.63        | 2.64       | 4.64        | 5.42        | 6.48        | 6.51 | 6.55        | 7.43        |
|----------|------------|------------|-------------|-------------|------------|-------------|-------------|-------------|------|-------------|-------------|
| WT APJ   | <b>Y35</b> | <b>F78</b> | <b>W85</b>  | <b>Y88</b>  | <b>T89</b> | <b>R168</b> | S205        | <b>W261</b> | Y264 | K268        | <b>Y299</b> |
| WT AT1R  | <b>Y35</b> | <b>F77</b> | <b>W84</b>  | <b>Y87</b>  | <b>T88</b> | <b>R167</b> | <b>K199</b> | <b>W253</b> | H256 | <b>T260</b> | <b>Y292</b> |
| WT AT2R  | <b>Y51</b> | L93        | <b>W100</b> | <b>Y103</b> | Y104       | <b>R182</b> | <b>K215</b> | <b>W269</b> | F272 | <b>T276</b> | F308        |
